# Supplementary material
Source: HighWire-hosted journal article supplement (https://bmjopen.bmj.com/content/14/5/e077618)
Supplement: inline-supplementary-material-1 [file inline-supplementary-material-1.pdf]

| Annex 1                                                   |                                                                                                                     |                                                                                                         |                                       |                                  |
|-----------------------------------------------------------|---------------------------------------------------------------------------------------------------------------------|---------------------------------------------------------------------------------------------------------|---------------------------------------|----------------------------------|
| Situation Categorization                                  | Treatment combinations                                                                                              | Typical diseases                                                                                        | Standardized disease severity (±0.05) | Level of medical institution     |
| ISmall Outpatient Clinic                                  | Outpatient prescribed medication                                                                                    | Common cold; indigestion; gastritis                                                                     | 0.1 (0.05-0.15)                       | Village clinics                  |
| IIGeneral Outpatient Clinic                               | General outpatient treatment + outpatient prescribed medication                                                     | Acute gastroenteritis                                                                                   | 0.2 (0.15-0.25)                       | Village clinics                  |
|                                                           | Minor examination + outpatient prescribed medication                                                                | Urticaria                                                                                               |                                       | Weak THC                         |
| IIIStandard Outpatient Clinic                             | Minor examination + general outpatient treatment + outpatient prescribed medication                                 | Otitis media; urinary tract infections;                                                                 | 0.3 (0.25-0.35)                       | Weak THC                         |
| IVOutpatient Surgery                                      | Minor examinations + minor operations + outpatient prescribed medication                                            | Excision of body surface masses (boils, haemorrhoids); fracture repositioning and fixation              | 0.4 (0.35-0.45)                       | General THC                      |
| V Inpatient Internal Medicine                             | Inpatient monitoring, care and treatment services                                                                   | Hospitalisation for progressive chronic disease (coronary heart disease); hospitalisation for pneumonia | 0.5 (0.45-0.55)                       | Central THC                      |
| VI Minor surgery inpatient/ suspected high risk diagnosis | minor surgery + inpatient monitoring, care, treatment services                                                      | appendicitis                                                                                            | 0.6 (0.55-0.65)                       | Central THC                      |
|                                                           | Suspected high risk: major examination + outpatient prescribed medication + general outpatient treatment operations | Gastroscopy for suspected gastrointestinal high-risk disease                                            |                                       | Community Hospitals/ Quality THC |
| VII Major internal medicine admission                     | Major examination + inpatient monitoring, care, treatment services                                                  | Stroke attack, Progressive cirrhosis of the liver                                                       | 0.7 (0.65-0.75)                       | County Hospitals                 |
| VIII Major surgery admissions                             | Major surgery + inpatient monitoring, care,                                                                         | Major lobectomy of the lungs Liver and kidney transplantation                                           | 0.8 (0.75-0.85)                       | Tertiary Hospitals               |

|                               |                                               |                                                                                  |                 |                        |
|-------------------------------|-----------------------------------------------|----------------------------------------------------------------------------------|-----------------|------------------------|
|                               | treatment services +<br>major investigations  |                                                                                  |                 |                        |
| IX Acute and<br>Critical Care | Critical care resuscitation<br>and monitoring | Acute heart attack<br>stenting; haemorrhage<br>and shock; respiratory<br>failure | 0.9 (0.85-0.95) | Grade IIIA<br>hospital |
