# Supplementary material
Source: HighWire-hosted journal article supplement (https://bmjopen.bmj.com/content/14/5/e077618)
Supplement: inline-supplementary-material-2 [file inline-supplementary-material-2.pdf]

**Annex 2**

| Number             | Scenario symptoms                                                                                                                     | Prediagnosis judgment                                                                                                                 | Score |
|--------------------|---------------------------------------------------------------------------------------------------------------------------------------|---------------------------------------------------------------------------------------------------------------------------------------|-------|
| D1-common cold     | It's been three days since I had a sore throat, runny nose, sneezing, coughing and lack of energy, and it's still not getting better. | Take your own medication without going to the doctor?                                                                                 | 0.05  |
|                    |                                                                                                                                       | Do you go to the doctor? *                                                                                                            | 0.1   |
|                    |                                                                                                                                       | Is it necessary to see a doctor at a county hospital?                                                                                 | 0.6   |
|                    |                                                                                                                                       | Do you need a blood test?                                                                                                             | 0.2   |
|                    |                                                                                                                                       | Do you need a transfusion?                                                                                                            | 0.3   |
|                    |                                                                                                                                       | Do you need a X-ray to check for pneumonia?                                                                                           | 0.4   |
| D2-gastritis       | In the last ten days, I have felt uncomfortable stomach, often bloating, stomachache, hiccups and bad appetite.                       | Take your own medication without going to the doctor?                                                                                 | 0.05  |
|                    |                                                                                                                                       | Do you need to see a doctor and take some medicine? *                                                                                 | 0.15  |
|                    |                                                                                                                                       | Is it necessary to see a doctor at a county hospital?                                                                                 | 0.6   |
|                    |                                                                                                                                       | Is it necessary to have a gastroscopy now that I can have a full check-up for stomach disorders?                                      | 0.65  |
| D3-gastroenteritis | I had diarrhea five times a day, and my stomach was very painful. I didn't feel well all day.                                         | Take your own medication without going to the doctor?                                                                                 | 0.05  |
|                    |                                                                                                                                       | Do you go to the doctor?                                                                                                              | 0.1   |
|                    |                                                                                                                                       | Is it necessary to see a doctor at a county hospital?                                                                                 | 0.6   |
|                    |                                                                                                                                       | Do you need a blood test?                                                                                                             | 0.2   |
|                    |                                                                                                                                       | Do you need a transfusion?                                                                                                            | 0.3   |
|                    |                                                                                                                                       | Do you need a stool test?                                                                                                             | 0.4   |
| D4-urticaria       | Basically every day I get an itch and I scratch it and I break out in a rash and it goes away on its own.                             | Is a colonoscopy necessary now to see if there are any other serious diseases of the intestines?                                      | 0.65  |
|                    |                                                                                                                                       | Take your own medication without seeing a doctor?                                                                                     | 0.05  |
|                    |                                                                                                                                       | Do I need to see a doctor to see what's going on and get some medication? *                                                           | 0.25  |
|                    |                                                                                                                                       | Do I need to see a dermatologist or a general internist?                                                                              | 0.6   |
|                    |                                                                                                                                       | Do I need to have a blood test?                                                                                                       | 0.3   |
| D5-otitis media    | In the last week, there was pain and tinnitus in the ears, and pus flowing out of the ears.                                           | Do I need to test for allergens to see what I am allergic to?                                                                         | 0.65  |
|                    |                                                                                                                                       | Use your own medication without seeing a doctor?                                                                                      | 0.05  |
|                    |                                                                                                                                       | Do you need a doctor to look at your ears and deal with the pus? *                                                                    | 0.3   |
|                    |                                                                                                                                       | Is it necessary to have an ear, nose and throat specialist or is a general practitioner of internal and external medicine sufficient? | 0.6   |

|                               |                                                                                                                                   |                                                                                                   |      |
|-------------------------------|-----------------------------------------------------------------------------------------------------------------------------------|---------------------------------------------------------------------------------------------------|------|
| D6-furuncle                   | A hard bump on the neck, the size of a fingernail, but painful, growing larger and larger. It has been there for a week.          | Use your own medicine without going to the doctor?                                                | 0.05 |
|                               |                                                                                                                                   | Do you need to see a doctor?                                                                      | 0.1  |
|                               |                                                                                                                                   | Do you need a doctor to cut you open and drain the pus? *                                         | 0.35 |
|                               |                                                                                                                                   | Is it necessary to go to a doctor at a county hospital to do this?                                | 0.6  |
|                               |                                                                                                                                   | Do I need to have the contents examined to see if it is benign or malignant after the incision?   | 0.65 |
| D7-hemorrhoids                | The bowel movements have been painful and bloody in the last week.                                                                | Take your own medication without seeing a doctor?                                                 | 0.05 |
|                               |                                                                                                                                   | Do you need to see a doctor to get checked out and take minor operations when necessary? *        | 0.4  |
|                               |                                                                                                                                   | Is it necessary to see a doctor at a county hospital?                                             | 0.6  |
|                               |                                                                                                                                   | Do I need a proctoscopy to rule out rectal cancer?                                                | 0.65 |
| D8-fracture                   | I fell off my bike and my hand fell to the ground. It was very sore and swollen, and I couldn't move it. I've had half a day off. | Buy your own medicine without going to the doctor?                                                | 0.05 |
|                               |                                                                                                                                   | Do you want to go to the hospital to have a X-ray taken for possible surgery? *                   | 0.45 |
|                               |                                                                                                                                   | Is it necessary to have a CT so that you can see it better?                                       | 0.55 |
|                               |                                                                                                                                   | Is it necessary to go to the doctor at the county hospital to see the X-ray for diagnosis?        | 0.6  |
| D9-coronary heart disease     | Twice in the last month I have had angina with chest tightness, dizziness and profuse sweating, relieved after half an hour.      | Take your own medication without seeing a doctor?                                                 | 0.05 |
|                               |                                                                                                                                   | Do I need to see a doctor for an ECG inpatient monitoring?*                                       | 0.5  |
|                               |                                                                                                                                   | Is it necessary to see a doctor at a county hospital?                                             | 0.6  |
|                               |                                                                                                                                   | Do I need more accurate heart tests? For example, cardiac magnetic resonance imaging, coronary CT | 0.65 |
| D10-acute simple appendicitis | severe pain in the lower right side of the stomach, not getting better all the time, possibly appendicitis                        | (Would you have surgery for appendicitis? Where would you have it done?) No surgery ?             | 0.4  |
|                               |                                                                                                                                   | Township health centre?*                                                                          | 0.55 |
|                               |                                                                                                                                   | County hospital ?                                                                                 | 0.65 |
